# Supplementary material for: Covalent organic framework-encapsulated europium clusters for convenient detection of Ag+ released by nanosilver
Source: Royal Society of Chemistry journal article supplement (doi:10.1039/d5en00251f), 2025-01-01
Supplement: d5en00251f1.pdf [file d5en00251f1.pdf]

**Supporting Information for**

**Covalent Organic Frameworks Encapsulated Europium  
Clusters for Convenient Detection of Ag<sup>+</sup> Released by  
Nanosilver**

Lu-Dan Yu,<sup>a,b</sup> Yu-Xin Ye,<sup>b</sup> Xinying Gong,<sup>c</sup> Dongmei Wang,<sup>c</sup> Yuan-Jun Tong,<sup>c,\*</sup>  
Jianqiao Xu,<sup>b</sup> Zhengjun Gong,<sup>c</sup> Gangfeng Ouyang<sup>b</sup>

<sup>a</sup> Northeast Guangdong Key Laboratory of New Functional Materials, School of Chemistry and Environment, Jiaying University, Meizhou, 514015, P.R. China.

<sup>b</sup> MOE Key Laboratory of Bioinorganic and Synthetic Chemistry/KLGHEI of Environment and Energy Chemistry, School of Chemistry, Sun Yat-sen University, Guangzhou, 510006, China.

<sup>c</sup> School of Environmental Science and Engineering, Southwest Jiaotong University, Chengdu 611756, Sichuan, China.

\*Corresponding Author, E-mail: tongyj@swjtu.edu.cn (Y.-J. Tong)

## Table of Contents

|                                         |     |
|-----------------------------------------|-----|
| Supplementary Experimental Section..... | S3  |
| Figure S1.....                          | S5  |
| Figure S2.....                          | S6  |
| Figure S3.....                          | S7  |
| Figure S4.....                          | S8  |
| Figure S5.....                          | S9  |
| Figure S6.....                          | S10 |
| Table S1 and S2.....                    | S11 |
| References.....                         | S12 |

## **1. EXPERIMENTAL SECTION**

### **1.1 Apparatus.**

All reagents of analytical grades were obtained from commercial sources and used without further purification. The UV-vis absorption spectra were collected on an UV-2450 spectrophotometer (Shimadzu, Japan). JEOL2010 transmission electron microscope (TEM, Japan) were used to characterize the morphologies of the materials. Fluorescence spectra were performed on an F-97 Pro fluorescence spectrometer (Shanghai Lingguang Technology Co. LTD, Shanghai, China). The slit widths (including excitation and emission) and the photomultiplier tube (PMT) voltage were set at 10 nm and 750 V, respectively. The X-ray photoelectron spectroscopy (XPS) was conducted with a Thermo ESCALAB 250 spectrometer (USA) using an Al Ka monochromator source ( $h\nu=1486.6$  eV) and a multidetection analyzer. Fourier transform infrared (FTIR) spectra were recorded in the 4000-400  $\text{cm}^{-1}$  region using KBr pellets and a Nicolet/Nexus-670 FTIR spectrometer. Powder X-ray diffraction patterns (PXRD) were determined with a Rigaku Smart Lab diffractometer (Bragg-Brentano geometry, Cu K $\alpha$ 1 radiation,  $\lambda = 1.54056$  Å).

### **1.2 Fluorescence quantum yield measurement.**

The absolute quantum yields (QY) was calculated as the ratios between the emitted light and the absorbed excitation light by the materials. The measurements were performed using an integrating sphere attached to Edinburgh FLS 1000 with the excitation light at 330 nm from a 450 W Xenon

lamp. The suspension of each material was placed in a UV quartz cuvette with a light path of 10 mm to measure its QY. Meanwhile, the solvent (water) filled in another quartz cuvette was used as a blank sample for reference. The spectral correction curve that related to the sensitivity of the monochromator, detector, sphere coating, and optics to wavelength was deducted.

### **1.3 XPS test**

In this work, the X-ray photoelectron spectroscopy (XPS) was conducted with a Thermo ESCALAB 250 spectrometer (USA) using an Al K $\alpha$  monochromator source ( $h\nu=1486.6$  eV) and a multidetection analyzer. The sample was prepared on silicon substrate by aluminum double-tape. The sample based film was loaded into Thermo Fisher Scientific ESCALAB 250 XPS system, where Ar $^{+}$  bombardment was performed and surface chemical state of the sample was characterized. XPS spectra were recorded using a monochromated Al K $\alpha$  (1486.6 eV) X-ray source with the take-off angle of 90° after different Ar $^{+}$  bombardment time. The Ar $^{+}$  bombardment was operated with EX05 argon ion gun whose angle arrangement given the sample surface normal is 45° at a chamber pressure of  $1\times 10^{-6}$  Pa. The ion beam voltage was 3 kV and the emission current was 2  $\mu$ A. The spectra were collected and analyzed by Advantage software.

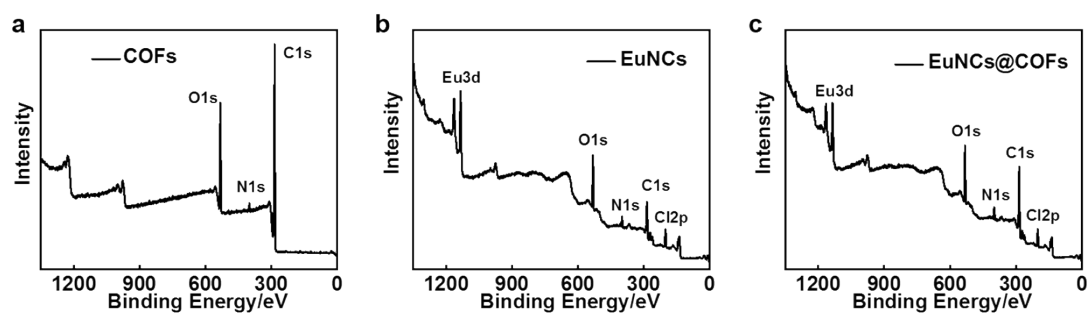

**Figure S1.** XPS spectra of (a) COFs, (b) EuNCs and (c) EuNCs@COFs, respectively.

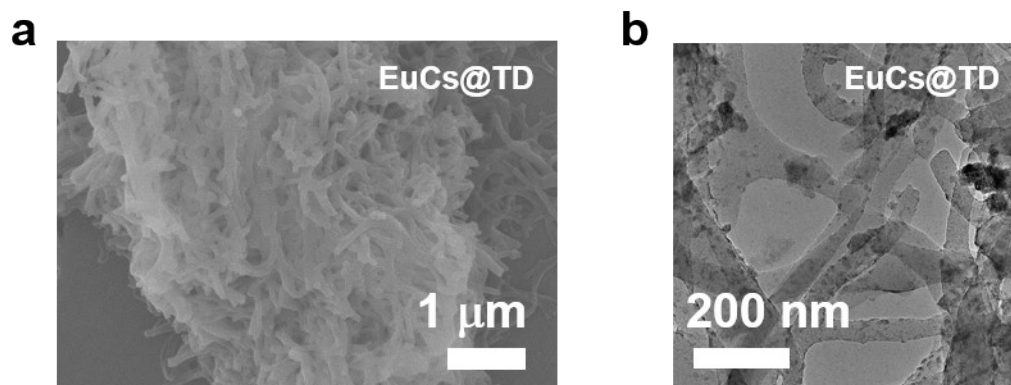

**Figure S2.** (a) SEM and (b) TEM images of EuNCs@COFs, respectively.

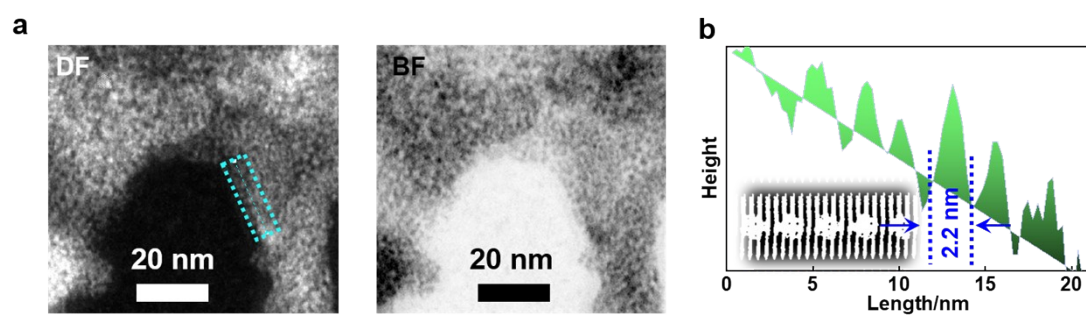

**Figure S3.** (a) SEM image of EuCs@TD. (b) TEM image of EuCs@TD. (e) HAADF images of EuCs@TD. DF represents dark field. BF represents bright field. (f) EDS mapping of the C, N, O, Cl and Eu elements in EuCs@TD.

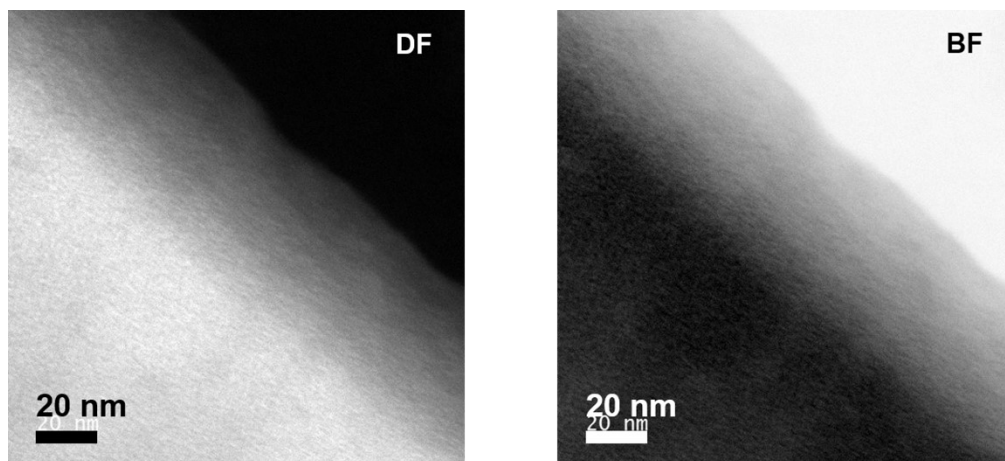

**Figure S4.** HAADF images of TD COFs. DF represents dark field. BF represents bright field.



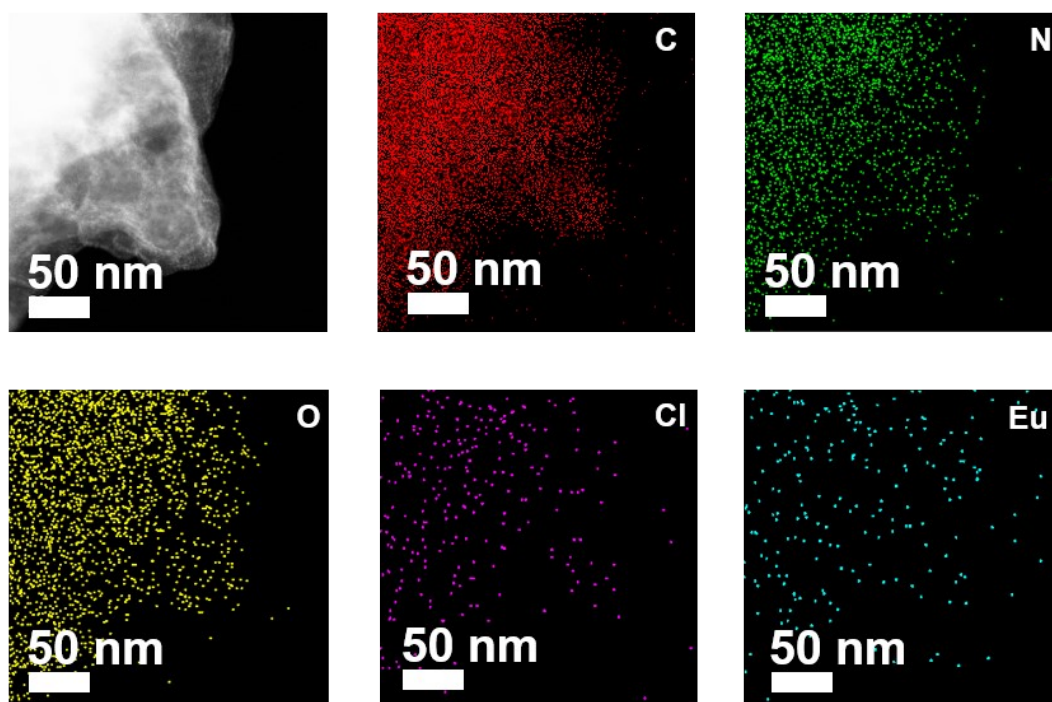

**Figure S5.** EDS mapping of the C, N, O, Cl and Eu elements in EuNCs@COFs.

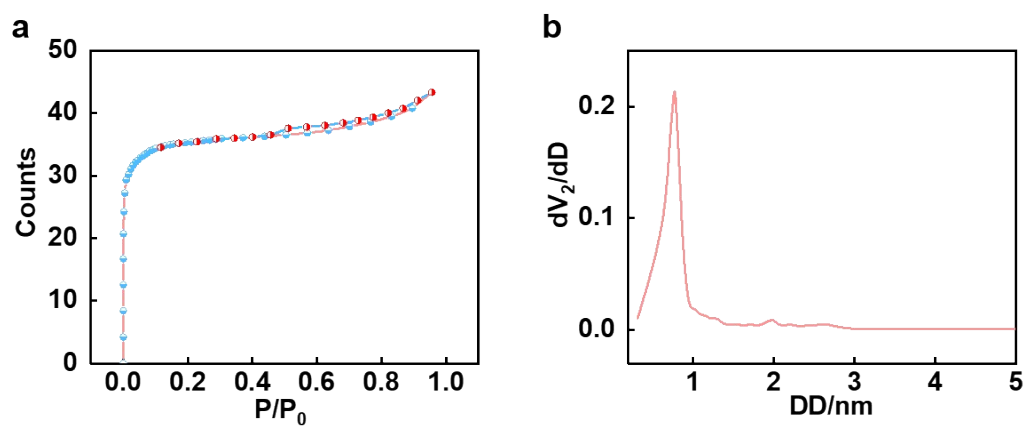

**Figure S6.** (a)  $N_2$  isothermal adsorption-desorption curves of TD COFs. (b) Corresponding pore size distribution of TD COFs.

**Table S1.** Comparison with other methods for sensing Ag<sup>+</sup>.

| Methods         | Materials             | Response Time | Linear Range (nM) | LOD (nM) | References |
|-----------------|-----------------------|---------------|-------------------|----------|------------|
| Colorimetric    | TiO <sub>2</sub> PNZs | 300 s         | 0-200000          | 920      | 1          |
| Colorimetric    | AuNCs                 | 600 s         | 500-10000         | 204      | 2          |
| Colorimetric    | TMB-DNA               | 900 s         | /                 | 1.9      | 3          |
| Electrochemical | MXene                 | 10 s          | 500–10000         | 615      | 4          |
| Fluorescence    | TPE-4TA               | 7200 s        | 40-15000          | 2.3      | 5          |
| Fluorescence    | LnMOF-2               | /             | /                 | 50       | 6          |
| Fluorescence    | TbC                   | /             | 0-800000          | 14900    | 7          |
| Fluorescence    | EuCs@TD               | Real time     | 1-10000           | 0.35     | This work  |

**Table S2** Various fluorescent sensing strategies for detection of UO<sub>2</sub><sup>2+</sup>.

| Commercial AgNPs | EuNCs@COFs | RSD(n=3) | Ag <sup>+</sup> electrode | Consistency |
|------------------|------------|----------|---------------------------|-------------|
| 1                | 52.7 nM    | 7.8%     | 58.6                      | 93%         |
| 2                | 23.5 nM    | 11.5%    | 20.1                      | 117%        |

## References

1. J. Li, W. Tan, X. Li, P. Zhang, P. Jin, J. Fan, K. Li, Silver Ion-Facilitated Singular Poulos–Kraut Mechanism of O–O Heterolysis to Enhance the Light Activation of H<sub>2</sub>O<sub>2</sub> over Peroxidase-Mimicking Photonanozymes. *Anal. Chem.* 2023, **95** (33), 12435-12442.
2. Y. Chang, Z. Zhang, J. Hao, W. Yang, J. Tang, BSA-stabilized Au clusters as peroxidase mimetic for colorimetric detection of Ag<sup>+</sup>. *Sens. Actuators Chem.* 2016, **232**, 692-697.
3. Y. Wang, H. Zhang, H. Hu, X. Jiang, X. Zhang, P. Wu, Selective Heavy Atom Effect-Promoted Photosensitization Colorimetric Detection of Ag<sup>+</sup> in Silver Ore Samples. *Anal. Chem.* 2023, **95** (16), 6501-6506.
4. C. Liu, X. Wei, S. Hao, B. Zong, X. Chen, Z. Li, S. Mao, Label-Free, Fast Response, and Simply Operated Silver Ion Detection with a Ti<sub>3</sub>C<sub>2</sub>Tx MXene Field-Effect Transistor. *Anal. Chem.* 2021, **93** (22), 8010-8018.
5. S. Xie, A. Y. H. Wong, R. T. K. Kwok, Y. Li, H. Su, J. W. Y. Lam, S. Chen, B. Z. Tang, Fluorogenic Ag<sup>+</sup>–Tetrazolate Aggregation Enables Efficient Fluorescent Biological Silver Staining. *Angew. Chem. Int. Ed.* 2018, **57** (20), 5750-5753.
6. Y.-X. Li, S.-J. Li, P.-F. Yan, X.-Y. Wang, X. Yao, G.-H. An, G.-M. Li, Luminescence-colour-changing sensing of Mn<sup>2+</sup> and Ag<sup>+</sup> ions based on a white-light-emitting lanthanide coordination polymer. *Chem. Commun.* 2017, **53** (36), 5067-5070.
7. Z.-H. Zhu, J.-M. Peng, H.-L. Wang, H.-H. Zou, F.-P. Liang, Assembly Mechanism and Heavy Metal Ion Sensing of Cage-Shaped Lanthanide Nanoclusters. *Cell Rep. Phy. Sci.* 2020, **1** (8), 100165.
